# Supplementary material for: Ambulatory care after acute kidney injury: an opportunity to improve patient outcomes
Source: PubMed Central journal article supplement (PMC4595050; doi:10.1186/s40697-015-0071-8), 2015-10-06
Supplement: 40697_2015_71_MOESM1_ESM.pdf [file 40697_2015_71_MOESM1_ESM.pdf]

## Acute Kidney Injury (AKI) Follow-up Clinic Referral Form

Date of Referral: \_\_\_\_\_

Staff MD/NP: \_\_\_\_\_

Referral Source:

- Internal medicine
- CV surgery
- Cardiology
- Nephrology
- Other: \_\_\_\_\_

Dialysis required:       Yes       No  
If Yes:                       CRRT       SLED       IHD       Unknown

ICU stay:       Yes       No

Nephrology consults involved:       Yes       No

Does patient have an outpatient nephrologist:       Yes       No

Baseline creatinine: \_\_\_\_\_ or  unknown

Expected date of hospital discharge: \_\_\_\_\_

Additional details:

---

---

---

Fax consultation request to—416-867-3709  
AKI clinic secretary—416-867-7460 (ext. 8209)

All AKI clinics are held on 61 Queen Street, 9<sup>th</sup> floor. The target appointment date is within 30 days of hospital discharge, unless otherwise requested
